# Supplementary material for: Distinct profile and prognostic impact of body composition changes in idiopathic pulmonary fibrosis and idiopathic pleuroparenchymal fibroelastosis
Source: PubMed Central journal article supplement (PMC6145941; doi:10.1038/s41598-018-32478-z), 2018-09-19
Supplement: 41598_2018_32478_MOESM1_ESM.pdf [file 41598_2018_32478_MOESM1_ESM.pdf]

1 **Distinct profile and prognostic impact of body composition changes in idiopathic pulmonary fibrosis and idiopathic pleuroparenchymal**  
2 **fibroelastosis**

3

4 Yuzo Suzuki, M.D., Ph.D.<sup>1</sup>, Katsuhiko Yoshimura, M.D.<sup>1</sup>, Yasunori Enomoto, M.D.<sup>1</sup>, Hideki Yasui, M.D., Ph.D.<sup>1</sup>, Hironao Hozumi, M.D.,  
5 Ph.D.<sup>1</sup>, Masato Karayama, M.D., Ph.D.<sup>1</sup>, Kazuki Furuhashi, M.D., Ph.D.<sup>1</sup>, Noriyuki Enomoto, M.D., Ph.D.<sup>1</sup>, Tomoyuki Fujisawa, M.D., Ph.D.<sup>1</sup>,  
6 Yutaro Nakamura, M.D., Ph.D.<sup>1</sup>, Naoki Inui, M.D., Ph.D.<sup>1</sup>, Takafumi Suda, M.D., Ph.D.<sup>1</sup>

7

8 <sup>1</sup>Second Division, Department of Internal Medicine, Hamamatsu University School of Medicine, Hamamatsu, Japan

9

10 **Supplement Table 1. Clinical characteristics with 131 IPF patients, 43 iPPFE patients, and 78 controls.**

|                                      | Controls (n=78)           | IPF (n=131)<br>UIP/IPF 50 (38.2%),<br>cIPF 81(61.8%) | iPPFE (n=43)            | P-value<br>(IPF vs cPPFE) |
|--------------------------------------|---------------------------|------------------------------------------------------|-------------------------|---------------------------|
| Age, yr                              | 70.0 [60.5-76.0]          | 69.0 [64.0-75.0]                                     | 69.0 [64.0-74.0]        | p=0.863                   |
| Sex, male/female                     | 62 (79.5%) / 16 (20.5%)   | 117 (89.3%) /14 (10.7%)                              | 27 (62.8%) / 16 (37.2%) | p<0.001                   |
| Observation period, mo               | –                         | 53.3 [31.6-86.1]                                     | 31.3 [18.2-47.2]        | p<0.001                   |
| Never or former/current smoker       | 1418 (18.0%), 64 (82.1%)  | 20 (15.3%), 111 (84.7%)                              | 29 (67.4%), 14 (32.6%)  | p<0.001                   |
| Smoking pack-year                    | 29 [9.1-50.0]             | 35.0 [20.0-60.0]                                     | 0 [0-12.5]              | p<0.001                   |
| acute exacerbation, yes              | –                         | 39 (29.8%)                                           | 8 (18.6%)               | p=0.171                   |
| Height, cm                           | 164.5 [159.1-169.2]       | 162.1 [157.0-166.0]                                  | 159.0 [152.0-165.0]     | p=0.051                   |
| Weight, kg                           | 63.9 [55.3-69.7]          | 60.0 [52.1-67.0]                                     | 42.3 [35.8-48.0]        | p<0.001                   |
| BMI, kg/m <sup>2</sup>               | 23.5 [21.2-25.5]          | 23.1 [21.3-24.7]                                     | 17.2 [14.7-18.5]        | p<0.001                   |
| ESM <sub>CSA</sub> , cm <sup>2</sup> | 42.4 [34.1-47.5]          | 32.8 [27.1-37.7]                                     | 23.4 [17.8-30.6]        | p<0.001                   |
| ESM <sub>MA</sub> , HU               | 42.5 [38.1-46.3]          | 42.0 [35.7-45.7]                                     | 43.5 [38.2-48.7]        | p=0.090                   |
| <b>Pulmonary Function Test</b>       |                           |                                                      |                         |                           |
| FVC, %-pred                          | 105.1 [92.0-113.1] (n=51) | 80.5 [66.4-92.9] (n=120)                             | 54.4 [45.8-67.5] (n=37) | p<0.001                   |
| FEV <sub>1</sub> /FVC, %             | 77.3 [73.7-81.3] (n=51)   | 83.5 [79.4-88.0] (n=120)                             | 96.3 [91.4-100] (n=37)  | p<0.001                   |
| DLCO, %                              | –                         | 68.6 [55.4-97.1] (n=52)                              | 68.7 [47.9-91.9] (n=24) | p=0.700                   |
| <b>Laboratory</b>                    |                           |                                                      |                         |                           |
| PaO <sub>2</sub> , Torr              | –                         | 80.0 [73.0-89.1] (n=111)                             | 79.0 [71.5-84.9] (n=38) | p=0.320                   |
| PaCO <sub>2</sub> , Torr             | –                         | 41.9 [39.0-44.0] (n=111)                             | 46.7 [41.3-49.0] (n=38) | p<0.001                   |
| Alb, g/dl                            | –                         | 4.0 [3.8-4.3] (n=124)                                | 4.0 [3.5-4.1] (n=40)    | p=0.153                   |

|            |   |                              |                            |         |
|------------|---|------------------------------|----------------------------|---------|
| KL-6, U/ml | – | 868.5 [547.3-1240.5] (n=114) | 503.0 [365.0-638.8] (n=42) | p<0.001 |
| SP-D ng/ml | – | 203.0 [133-316] (n=111)      | 186.0 [134.3-269.5] (n=40) | p=0.565 |

11

12 BMI; body mass index, ESM<sub>CSA</sub>; cross-sectional area of elector spine muscles, ESM<sub>MA</sub>; muscle attenuation of elector spine muscles, FVC;

13 forced vital capacity, FEV<sub>1.0</sub>; forced expiratory volume in 1.0 second, DLCO; diffuse capacity of the lung for carbon monoxide, KL-6; Krebs von

14 den Lunge-6, SP-D; surfactant protein-D

15
